# Supplementary material for: Antenatal Influenza A-Specific IgA, IgM, and IgG Antibodies in Mother’s Own Breast Milk and Donor Breast Milk, and Gastric Contents and Stools from Preterm Infants
Source: MDPI journal article supplement (doi:10.3390/nu11071567), 2019-07-11
Supplement: s1 [file s1]

**Table S1.** Demographics of preterm-delivering mother-infant pairs sampled for MBM and DBM feeds, gastric contents (1-h postprandial time) and stools (24-h post-feeding).

| Demographics                                                 | Preterm-Delivering Mother Infant Pairs <sup>1-2</sup> |
|--------------------------------------------------------------|-------------------------------------------------------|
| GA, week                                                     | 30 ± 3 (26–36)                                        |
| Postnatal age for mother’s milk, days                        | 8.6 ± 0.1 and 21.4 ± 0.1                              |
| Postnatal age for donor breast milk, days                    | 8.4 ± 0.1 and 21.6 ± 0.1                              |
| Birth weight at birth, kg                                    | 1.5 ± 0.7 (0.7–3.6)                                   |
| Weight gain velocity, g/kg/day <sup>3</sup>                  | 11 ± 4                                                |
| Length gain velocity, cm/wk <sup>3</sup>                     | 1.0 ± 0.3                                             |
| Head circumference gain velocity, cm/wk <sup>3</sup>         | 0.6 ± 0.3                                             |
| Volume of feeding at 8–9 days of postnatal age, mL           | 16 ± 12 (2.5–38)                                      |
| Volume of feeding at 21–22 days of postnatal age, mL         | 28 ± 10 (14–49)                                       |
| Infant sex                                                   | 10 females; 10 males                                  |
| Infant of a diabetic mother, <i>n</i>                        | 3                                                     |
| SGA10, less than the 10th percentile <sup>4</sup> , <i>n</i> | 2                                                     |
| SGA3, less than the 3rd percentile <sup>4</sup> , <i>n</i>   | 1                                                     |
| Intrauterine illicit drug exposure, <i>n</i>                 | 2                                                     |
| C-section, <i>n</i>                                          | 16                                                    |
| Retinopathy of prematurity, <i>n</i>                         | 0                                                     |
| Chronic lung disease, <i>n</i>                               | 2                                                     |
| Gram-negative sepsis, <i>n</i>                               | 1                                                     |
| Gram-positive sepsis or fungal sepsis                        | 0                                                     |
| Late-onset sepsis                                            | 1                                                     |
| Antibiotics <sup>5</sup> received postnatally, <i>n</i>      | 5                                                     |
| Necrotizing enterocolitis                                    | 0                                                     |
| Gastrointestinal bleeding                                    | 0                                                     |
| Cardiopulmonary resuscitation                                | 0                                                     |
| Infant death                                                 | 0                                                     |
| Length of stay in NICU                                       | 47 ± 29 (10–109)                                      |

<sup>1</sup> Values are mean ± SD (range); <sup>2</sup> Number of paired milk and gastric and stool samples from preterm infants is *n* = 20; <sup>3</sup> Birth to discharge; <sup>4</sup> Small for gestational age (SGA) on the Fenton 2013 Growth chart; <sup>5</sup> Antibiotics were ampicillin/cefdinir for 3 infants and ampicillin/gentamycin for 2 infants.

**Table S2.** Description of influenza vaccine (Flucelvax Quadrivalent 2017–2018 Formula) given to mothers during pregnancy.

| Information             | Description                                                                                                                                                                                                                                                  |
|-------------------------|--------------------------------------------------------------------------------------------------------------------------------------------------------------------------------------------------------------------------------------------------------------|
| Hemagglutinin (HA) dose | 60 (15 mcg HA of each strain) mcg per 0.5-mL                                                                                                                                                                                                                 |
| Eight influenza strains | A/Singapore/GP1908/2015 IVR-180 (H1N1) (an A/Michigan/45/2015-like virus)<br>A/Singapore/GP2050/2015 (H3N2) (an A/Hong Kong/4801/2014-like virus)<br>B/Utah/9/2014 (a B/Phuket/3073/2013-like virus)<br>B/Hong Kong/259/2010 (a B/Brisbane/60/08-like-virus) |
| Manufacturer            | Seqirus Inc, Holly Springs, NC, USA                                                                                                                                                                                                                          |
| Inactivated vaccine     | Intramuscular injection in the region of the deltoid muscle of the upper arm.                                                                                                                                                                                |

**Table S3.** Statistical results (*p*-values) for Student's *t*-tests comparing antibody concentration between infants that received antibiotics (*n* = 5 at 8–9 days and *n* = 5 at 21–22 days of postnatal age) and infants that did not receive antibiotics (*n* = 15 at 8–9 days and *n* = 11 at 21–22 days) in gastric and stool samples. G, gastric contents; S, stool.

| Antibodies  | G DBM8–9 | G DBM21–22 | G MBM8–9 | G MBM21–22 | S 8–9 | S 21–22 |
|-------------|----------|------------|----------|------------|-------|---------|
| H1N1 HA IgA | 0.23     | 0.51       | 0.61     | 0.12       | 0.41  | 0.41    |
| H3N2 NA IgA | 0.58     | 0.23       | 0.48     | 0.92       | 0.46  | 0.09    |
| H1N1 HA IgM | 0.73     | 0.78       | 0.27     | 0.60       | 0.39  | 0.35    |
| H3N2 NA IgM | 0.25     | 0.49       | 0.27     | 0.71       | 0.16  | 0.66    |
| H1N1 HA IgG | 0.30     | 0.43       | 0.61     | 0.27       | 0.75  | 0.43    |
| H3N2 NA IgG | 0.56     | 0.22       | 0.28     | 0.78       | 0.90  | 0.36    |

**Table S4.** Geometric mean relative abundance (GMRA) of anti-influenza A IgA, IgM and IgG (H1N1 hemagglutinin (H1N1 HA) and H3N2 neuraminidase (H3N2 NA)) in mother's own breast milk (MBM) and donor breast milk (DBM) at 8–9 days and for 21–22 days of postnatal age. MBM samples were from 20 preterm-delivering mothers (26–36 weeks of gestational age). *p*-values were calculated using the Wilcoxon matched-pairs signed-rank test.

| Isotype in Feeds | Postnatal Age (days) | Specificity | MBM GMRA (EU/mL, 95% CI) | DBM GMRA (EU/mL, 95% CI) | <i>p</i> -Value |
|------------------|----------------------|-------------|--------------------------|--------------------------|-----------------|
| IgA              | 8–9                  | H1N1 HA     | 1878 (139–3616)          | 523 (0–1339)             | 0.001           |
| IgA              | 21–22                | H1N1 HA     | 1149 (0–2928)            | 637.9 (0–1356.1)         | 0.33            |
| IgA              | 8–9                  | H3N2 NA     | 2936 (1519–4353)         | 1468 (960–1976)          | 0.008           |
| IgA              | 21–22                | H3N2 NA     | 1475 (246–2705)          | 1899 (1099–2700)         | 0.89            |
| IgM              | 8–9                  | H1N1 HA     | 1413 (360–2466)          | 139 (57–221)             | <0.001          |
| IgM              | 21–22                | H1N1 HA     | 457 (0–951)              | 155 (0–360)              | 0.002           |
| IgM              | 8–9                  | H3N2 NA     | 1688 (292–3083)          | 132 (0–357)              | 0.003           |
| IgM              | 21–22                | H3N2 NA     | 933 (0–2334)             | 115 (0–338)              | 0.015           |
| IgG              | 8–9                  | H1N1 HA     | 89 (51–128)              | 42.1 (36–48)             | <0.001          |
| IgG              | 21–22                | H1N1 HA     | 85 (33–136)              | 38 (31–45)               | <0.001          |
| IgG              | 8–9                  | H3N2 NA     | 8.7 (0–24)               | 25 (11–38)               | 0.031           |
| IgG              | 21–22                | H3N2 NA     | 15 (3.7–26)              | 18 (0.6–35)              | 0.62            |

**Table S5.** Geometric mean relative abundance (GMRA) of anti-influenza IgA, IgM and IgG (H1N1 hemagglutinin (H1N1 HA) and H3N2 neuraminidase (H3N2 NA)) in gastric contents fed mother's own breast milk (MBM) and donor breast milk (DBM) feeds. Gastric contents from infants fed MBM or DBM were from 20 mother-preterm pairs (26–36 weeks of gestational age at 8–9 days and for 21–22 days of postnatal age. P-values were calculated using the Wilcoxon matched-pairs signed-rank test.

| Isotype in Gastric | Postnatal Age (Days) | Specificity | MBM GMRA (EU/mL, 95% CI) | DBM GMRA (EU/mL, 95% CI) | <i>p</i> -Value |
|--------------------|----------------------|-------------|--------------------------|--------------------------|-----------------|
| IgA                | 8–9                  | H1N1 HA     | 1499 (320–2678)          | 406 (0–582)              | 0.034           |
| IgA                | 21–22                | H1N1 HA     | 699 (109–1289)           | 549 (0–1359)             | 0.32            |
| IgA                | 8–9                  | H3N2 NA     | 3536 (844–6229)          | 542 (0–1807)             | 0.002           |
| IgA                | 21–22                | H3N2 NA     | 1493 (730–2256)          | 414 (0–1185)             | 0.039           |
| IgM                | 8–9                  | H1N1 HA     | 1531 (438–2623)          | 267 (72–462)             | 0.001           |
| IgM                | 21–22                | H1N1 HA     | 405 (270–541)            | 201 (0–497)              | 0.19            |
| IgM                | 8–9                  | H3N2 NA     | 1547 (0–4301)            | 145 (0–360)              | <0.001          |
| IgM                | 21–22                | H3N2 NA     | 443 (0–903)              | 88 (0–224)               | 0.006           |
| IgG                | 8–9                  | H1N1 HA     | 48 (30–66)               | 60 (47–74)               | 0.26            |
| IgG                | 21–22                | H1N1 HA     | 82 (6.0–158)             | 48 (30–66)               | 0.20            |
| IgG                | 8–9                  | H3N2 NA     | 17 (0–37)                | 6.6 (0–19)               | 0.068           |
| IgG                | 21–22                | H3N2 NA     | 9.6 (2.3–17)             | 15 (0–39)                | 0.22            |

**Table S6.** *p*-value for the difference between MBM and gastric MBM or between DBM and gastric DBM on anti-influenza IgA, IgM and IgG reactivities (H1N1 HA and H3N2 NA). Feed and gastric samples were from 20 mother-preterm pairs (26–36 weeks of gestational age). *p*-values were calculated using the Wilcoxon matched-pairs signed-rank test.

| Isotype in Feed-Gastric | Postnatal Age (Days) | Specificity (EU/mL) | MBM vs. Gastric MBM ( <i>p</i> -Value) | DBM vs. Gastric DBM ( <i>p</i> -Value) |
|-------------------------|----------------------|---------------------|----------------------------------------|----------------------------------------|
| IgA                     | 8–9                  | H1N1 HA             | 0.25                                   | 0.49                                   |
| IgA                     | 21–22                | H1N1 HA             | 0.23                                   | 0.99                                   |
| IgA                     | 8–9                  | H3N2 NA             | 0.33                                   | 0.74                                   |
| IgA                     | 21–22                | H3N2 NA             | 0.27                                   | 0.064                                  |
| IgM                     | 8–9                  | H1N1 HA             | 0.49                                   | 0.083                                  |
| IgM                     | 21–22                | H1N1 HA             | 0.22                                   | 0.34                                   |
| IgM                     | 8–9                  | H3N2 NA             | 0.52                                   | 0.53                                   |
| IgM                     | 21–22                | H3N2 NA             | 0.22                                   | 0.19                                   |
| IgG                     | 8–9                  | H1N1 HA             | 0.43                                   | 0.001                                  |
| IgG                     | 21–22                | H1N1 HA             | 0.11                                   | 0.13                                   |
| IgG                     | 8–9                  | H3N2 NA             | 0.24                                   | 0.020                                  |
| IgG                     | 21–22                | H3N2 NA             | 0.001                                  | 0.37                                   |

**Table S7.** GMRA for anti-influenza IgA, IgM and IgG antibodies (H1N1 hemagglutinin (H1N1 HA) and H3N2 neuraminidase (H3N2 NA)) in stools from preterm infants. Stool samples were from 20 preterm infants at 26–36 weeks of gestational age. *p*-values were calculated using the Wilcoxon matched-pairs signed-rank test between 8–9 days and 21–22 days of postnatal age.

| Isotype in Stool | Specificity | GMRA 8–9 Days (EU/mL, 95% CI) | GMRA 21–22 Days (EU/mL, 95% CI) | <i>p</i> -Values |
|------------------|-------------|-------------------------------|---------------------------------|------------------|
| IgA              | H1N1 HA     | 61.6 (20.4–102.8)             | 71.2 (41.3–101.1)               | 0.40             |
| IgA              | H3N2 NA     | 135.3 (72.3–198.4)            | 125.0 (7.0–243.1)               | 0.98             |
| IgM              | H1N1 HA     | 59.2 (0–209.2)                | 46.1 (0–132.9)                  | 0.34             |
| IgM              | H3N2 NA     | 40.1 (0–112.7)                | 58.3 (10.8–105.8)               | 0.99             |
| IgG              | H1N1 HA     | 1.3 (0–4.2)                   | 0.7 (0.6–0.9)                   | 0.20             |

---

|     |         |               |               |      |
|-----|---------|---------------|---------------|------|
| IgG | H3N2 NA | 1.1 (0.4-1.8) | 1.0 (0.7-1.3) | 0.39 |
|-----|---------|---------------|---------------|------|
